# Supplementary material for: Has digital transformation improved corporate ESG performance?
Source: Research Square preprint supplement (doi:10.21203/rs.3.rs-7644701/v1), 2025-10-29
Supplement: Supplementary file 1 [file 31764839806206760fe8e594.docx]

# Appendix A: Statistical description and analysis of panel data-related indicators

The balanced panel data from A-share listed corporations served as the basis for the empirical findings in this research. After excluding the banking sector, 17 industry categories remained in the panel data, which matched 1,531 A-share listed businesses in China from 2012 to 2023 based on the 2012 industry category update. There are 18,372 samples, or 12 × 1,531. The descriptive statistical findings and indicator descriptions are displayed in Appendix table A.

**Appendix table A**

Statistical descriptions and explanations of indicators for a sample of 1,531 A-share listed companies between 2012 and 2023.

| **Code** | **Indicator description** | **AVG** | **VAR** | **MAX** | **MIN** | **MED** |
| --- | --- | --- | --- | --- | --- | --- |
| ESG | Quality of corporate ESG disclosure  （+）ESG disclosure status of listed companies | 72.8169 | 30.1722 | 92.9300 | 41.1900 | 41.1900 |
| E | Environmental protection  （+）Performance in the environmental protection section of ESG ratings | 61.3713 | 60.4089 | 95.1600 | 31.0800 | 61.0600 |
| S | Social responsibility  （+）Performance in the social responsibility section of ESG ratings | 74.0309 | 98.9266 | 100.0000 | 4.8800 | 74.7600 |
| G | Corporate governance  （+）Performance in the corporate governance section of ESG ratings | 78.4366 | 54.3505 | 97.3300 | 17.2000 | 79.8300 |
| TP | Total profit  （+）Reflecting business performance | 10.2687 | 3713.9027 | 2375.0000 | 713.0000 | 1.8010 |
| DIG | Digital transformation  （+）Degree of digital transformation of listed companies | 2.9411 | 1.5506 | 6.6307 | 0.0000 | 2.9444 |
| TI | Technological innovation  （+）Patent application status of listed companies | 1.1170 | 0.2404 | 2.7524 | 0.0342 | 0.9543 |
| LS | Labor income share  （+）The ratio of workers' income to total income | 0.1088 | 0.0001 | 0.1987 | 0.0442 | 0.1076 |
| Mf | Management expense efficiency  （-）Management expense ratio to operating revenue | 18.7325 | 1.3207 | 25.2133 | 13.2370 | 18.5938 |
| Lev | Leverage ratio  （-）Financial condition and debt levels of listed companies | 0.4826 | 0.0431 | 5.2709 | 0.0181 | 0.4827 |
| Top | Equity Concentration  （+）The shareholding ratio of the largest shareholder of a listed company | 0.3591 | 0.0121 | 0.7073 | 0.1263 | 0.3465 |
| Indep | Equity Concentration  （+）Proportion of independent directors in listed companies | 37.6337 | 31.0558 | 63.0569 | 7.4593 | 35.3920 |
| TobinQ | Tobin's Q  （-）The profitability and growth potential of listed companies | 0.9125 | 0.1189 | 2.7966 | -0.0804 | 0.8231 |
| Growth | Revenue Growth  （+）Revenue status during the operation of listed companies | 1.1439 | 0.1658 | 4.5602 | -7.7293 | 1.2001 |

*Notes:* AVG is the average value, VAR is the variance, MAX is the maximum value, MIN is the minimum value, and MED is the median. All results are rounded to four decimal places. (+) Indicates a positive association.

# Appendix B: Explanation of sample classification criteria

For the sub-sample statistics of each indicator, ESG indicators are categorized by regions and production factors, industry pollution levels (*E*), input factors (*S*), and property rights (*G*) in order to create sub-sample groups. In Appendix table B, the industrial classification is displayed.

**Appendix table B**

Corresponding classification of key indicators by industry and province

| **Classification criteria** | **Industry** | **Classification status** |
| --- | --- | --- |
| Production factors  （ESG） | Labor-intensive | A Agriculture, Forestry, Animal Husbandry, and Fishing (01 Agriculture, 02 Forestry, 03 Animal Husbandry, 05 Agriculture, Forestry, Animal Husbandry, and Fishing Services); B Mining (06 Coal Mining and Washing, 08 Ferrous Metal Ore Mining and Dressing, 09 Non-ferrous Metal Ore Mining and Dressing); C Manufacturing (13 Processing of Agricultural By-products, 14 Food Manufacturing, 15 Beverage Manufacturing, 17 Textile Manufacturing, 18 Textile Apparel and Accessories Manufacturing, 19 Leather, Fur, Feather, and Related Products and Footwear Manufacturing, 20 Wood Processing and Wood, Bamboo, Rattan, Palm, Grass Products Manufacturing, 21 Furniture Manufacturing, 23 Printing and Reproduction of Recorded Media, 24 Manufacture of Cultural, Educational, Arts and Crafts, Sports and Entertainment Goods, 32 Non-Ferrous Metal Smelting and Rolling Processing, 34 General Equipment Manufacturing); D Electricity, Heat, Gas, and Water Production and Supply (46 Water Production and Supply); E Construction (48 Civil Engineering Construction, 49 Building Installation, 50 Building Decoration, Renovation and Other Construction Activities); F Wholesale and Retail Trade (51 Wholesale Trade, 52 Retail Trade); G Transportation, Storage, and Postal Services (53 Railway Transportation, 54 Road Transport); H Accommodation and Food Services; I Information Transmission, Software and Information Technology Services (63 Telecommunications, Radio and Television, and Satellite Transmission Services, 64 Internet and Related Services); J Financial Intermediation; K Real Estate Activities (70 Real Estate Activities); L Leasing and Business Services (72 Business Services); M Scientific Research and Technical Services (73 Research and Experimental Development, 75 Science and Technology Promotion and Application Services); N Management of Water Conservancy, Environment and Public Facilities (78 Management of Public Facilities); O Public Administration, Social Security and Social Organization ; P Education (82 Education); Q Health and Social Work; R Culture, Sports and Entertainment (85 News and Publishing Activities, 87 Cultural and Arts Activities); S Integrated Activities (90 Integrated Activities). |
| Capital-intensive | A (04 Fishing); B (07 Oil and Gas Extraction, 11 Support Activities for Mining); C Manufacturing (22 Paper and Paper Product Manufacturing, 25 Petroleum and Coal Products Manufacturing, 26 Basic Chemical Manufacturing, 28 Manmade Fiber Manufacturing, 30 Nonmetallic Mineral Product Manufacturing, 31 Iron and Steel Mills and Ferroalloy Manufacturing); D (44 Electric Power Generation, Transmission and Distribution, 45 Natural Gas Distribution); G (55 Water Transportation, 56 Air Transportation); R (86 Motion Picture and Sound Recording Industries). |
| Technology-intensive | C Manufacturing (27 Pharmaceutical and Medicine Manufacturing, 29 Rubber and Plastic Products Manufacturing, 33 Fabricated Metal Product Manufacturing, 35 Machinery Manufacturing, 36 Motor Vehicle, Body, Trailer, and Parts Manufacturing, 37 Railroad, Ship, Aerospace, and Other Transportation Equipment Manufacturing, 38 Electrical Equipment Manufacturing, 39 Computer, Communication, and Other Electronic Equipment Manufacturing, 40 Measuring and Control Instrument Manufacturing, 41 Miscellaneous Manufacturing); M Professional, Scientific, and Technical Services (74 Professional, Scientific, and Technical Services); N Utilities and Environmental Services (77 Environmental and Conservation Services); I Information Technology Services (65 Software and IT Services). |
| Region  （ESG） | Eastern region | 1 Beijing; 2 Tianjin; 3 Hebei; 6 Liaoning; 9 Shanghai; 10 Jiangsu; 11 Zhejiang; 13 Fujian; 15 Shandong; 19 Guangdong; 21 Hainan |
| Central region | 4 Shanxi; 7 Jilin; 8 Heilongjiang; 12 Anhui; 14 Jiangxi; 16 Henan; 17 Hubei; 18 Hunan |
| Western region | 5 Inner Mongolia; 20 Guangxi; 22 Chongqing; 23 Sichuan; 24 Guizhou; 25 Yunnan; 27 Shaanxi; 28 Gansu; 29 Qinghai; 30 Ningxia; 31 Xinjiang; 32 Tibet |
| Pollution level classification（E） | High-pollution | B Mining (06 Coal Mining and Washing, 07 Petroleum and Natural Gas Extraction, 08 Ferrous Metal Ore Mining and Dressing, 09 Non-ferrous Metal Ore Mining and Dressing); C Manufacturing (17 Textile Manufacturing, 19 Leather, Fur, Feather, and Related Products and Footwear Manufacturing, 22 Paper and Paper Products Manufacturing, 25 Petroleum, Coal, and Other Fuel Processing, 26 Chemical Raw Materials and Chemical Products Manufacturing, 28 Chemical Fibre Manufacturing, 29 Rubber and Plastic Products Manufacturing, 30 Non-metallic Mineral Products Manufacturing, 31 Ferrous Metal Smelting and Rolling Processing, 32 Non-ferrous Metal Smelting and Rolling Processing); D Electricity, Heat, Gas, and Water Production and Supply (44 Electricity and Heat Production and Supply). |
| Low-pollution | A Agriculture, Forestry, Animal Husbandry and Fishing (01 Agriculture 02 Forestry 03 Animal Husbandry 04 Fishing 05 Agriculture, Forestry, Animal Husbandry and Fishing Services); B Mining (11 Mining and Related Support Activities); C Manufacturing (13 Processing of Agricultural By-products 14 Food Manufacturing 15 Beverage Manufacturing 18 Textile, Apparel and Accessories Manufacturing 20 Wood Processing and Wood, Bamboo, Rattan, Palm and Grass Products Manufacturing 21 Furniture Manufacturing 23 Printing and Reproduction of Recorded Media 24 Manufacture of Cultural, Educational, Arts and Crafts, Sports and Entertainment Goods 35 Special Equipment Manufacturing 36 Automobile Manufacturing 37 Railway, Shipbuilding, Aerospace and Other Transportation Equipment Manufacturing 38 Electrical Machinery and Equipment Manufacturing 39 Computer, Communications and Other Electronic Equipment Manufacturing 40 Instrument and Meter Manufacturing 41 Other Manufacturing 42 Waste Resource Comprehensive Utilization); D Gas and Water Production and Supply (45 Gas Production and Supply 46 Water Production and Supply); E Construction (48 Civil Engineering Construction 49 Building Installation 50 Building Decoration, Renovation and Other Construction Activities); F Wholesale and Retail Trade (51 Wholesale Trade 52 Retail Trade); G Transportation, Storage and Postal Services (53 Railway Transportation 54 Road Transport 55 Water Transport 56 Air Transport 58 Loading, Unloading and Transport Agency Services 59 Storage 60 Postal Services); H Accommodation and Food Services (61 Accommodation 62 Food Services);I Information Transmission, Software and Information Technology Services (63 Telecommunications, Broadcasting and Satellite Transmission Services 64 Internet and Related Services 65 Software and Information Technology Services); J Financial Intermediation; K Real Estate Activities (70 Real Estate Activities); L Leasing and Business Services (71 Leasing 72 Business Services); M Scientific Research and Technical Services (73 Research and Experimental Development 74 Professional Technical Services 75 Science and Technology Promotion and Application Services); N Management of Water Conservancy, Environment and Public Facilities (77 Ecological Conservation and Environmental Governance 78 Public Facilities Management); O Public Administration, Social Security and Social Organization; P Education (82 Education; Q Health and Social Work (83 Health 84 Social Work); R Culture, Sports and Entertainment (85 News and Publishing Activities 86 Broadcasting, Television, Film and Recording Production 87 Cultural Arts Activities 88 Sports 89 Entertainment); S Integrated Activities (90 Integrated Activities) |
| Allocation of input factors（S） | Technology-driven | C Manufacturing (25 Petroleum, Coal and Other Fuel Processing 26 Chemical Raw Materials and Chemical Products Manufacturing 27 Pharmaceutical Manufacturing 28 Chemical Fibre Manufacturing 29 Rubber and Plastic Products Manufacturing 31 Ferrous Metal Smelting and Rolling Processing 32 Non-Ferrous Metal Smelting and Rolling Processing 34 General Equipment Manufacturing 35 Specialized Equipment Manufacturing 36 Automobile Manufacturing 37 Railway, Shipbuilding, Aerospace and Other Transportation Equipment Manufacturing 38 Electrical Machinery and Equipment Manufacturing 39 Computer, Communications and Other Electronic Equipment Manufacturing 40 Instrument Manufacturing 41 Other Manufacturing); I Information Transmission, Software and Information Technology Services (63 Telecommunications, Broadcasting and Satellite Transmission Services 64 Internet and Related Services 65 Software and Information Technology Services); M Scientific Research and Technical Services (73 Research and Experimental Development) |
| Labor-driven | A Agriculture, Forestry, Animal Husbandry and Fishing (01 Agriculture 02 Forestry 03 Animal Husbandry 04 Fishing 05 Agriculture, Forestry, Animal Husbandry and Fishing Services); B Mining (06 Coal Mining and Washing 07 Petroleum and Natural Gas Extraction 08 Ferrous Metal Ore Mining and Dressing 09 Non-ferrous Metal Ore Mining and Dressing 11 Mining Support Activities); C. Manufacturing (13 Processing of Agricultural By-products 14 Food Manufacturing 15 Beverage Manufacturing 17 Textile Manufacturing 18 Textile, Apparel and Accessories Manufacturing 19 Leather, Fur, Feather and Related Products and Footwear Manufacturing 20 Wood Processing and Wood, Bamboo, Rattan, Palm and Grass Products Manufacturing 21 Furniture Manufacturing 22 Paper and Paper Products Manufacturing 23 Printing and Reproduction of Recorded Media 24 Manufacture of Educational, Arts and Crafts, Sports and Entertainment Goods 30 Non-metallic Mineral Products Manufacturing 33 Metal Products Manufacturing 42 Comprehensive Utilization of Waste Resources); D Electricity, Heat, Gas and Water Production and Supply (44 Electricity and Heat Production and Supply 45 Gas Production and Supply 46 Water Production and Supply); E Construction (48 Civil Engineering Construction 49 Building Installation 50 Building Decoration, Renovation and Other Construction Activities); F Wholesale and Retail Trade (51 Wholesale Trade 52 Retail Trade); G Transportation, Storage and Postal Services (53 Railway Transportation 54 Road Transport 55 Water Transport 56 Air Transport 58 Loading, Unloading and Transport Agency Services 59 Storage 60 Postal Services); H Accommodation and Food Services (61 Accommodation 62 Food Services); I Information Transmission, Software and Information Technology Services (Note: Codes Missing); J Financial Intermediation; K Real Estate Activities (70 Real Estate Activities); L Leasing and Business Services (71 Leasing 72 Business Services); M Scientific Research and Technical Services (74 Professional Technical Services 75 Science and Technology Promotion and Application Services); N Management of Water Conservancy, Environment and Public Facilities (77 Ecological Conservation and Environmental Governance 78 Public Facilities Management); O Public Administration, Social Security and Social Organization; P Education (82 Education); Q Health and Social Work (83 Health 84 Social Work); R Culture, Sports and Entertainment (85 News and Publishing Activities 86 Broadcasting, Television, Film and Recording Production 87 Cultural Arts Activities 88 Sports 89 Entertainment); S Integrated Activities (90 Integrated Activities) |

In the robustness test of this paper, based on all listed companies in China from 2012 to 2023 and matched with 17 core indicators of 32 provinces and 17 sub-industries, the statistical description of the sub-samples for ESG scores by production factors and regions, E scores by pollution levels, S scores by input factors, and G scores by property rights nature is shown in Appendix table C.

**Appendix table C**

Statistical description of subsamples of key indicators.

| **Code** | **Indicator description** | | **AVG** | **VAR** | **MAX** | **MIN** | **MED** |
| --- | --- | --- | --- | --- | --- | --- | --- |
| ESG | Overall data | | 72.8169 | 30.1722 | 92.9300 | 41.1900 | 41.1900 |
| Production factors | Labor-intensive | 72.7788 | 32.0229 | 92.9300 | 41.1900 | 73.0000 |
| Capital-intensive | 72.9769 | 27.9287 | 90.4000 | 46.7500 | 73.1800 |
| Technology-intensive | 72.5899 | 31.0888 | 90.9300 | 47.7900 | 72.6370 |
| Region | Eastern region | 73.2172 | 29.7075 | 90.9300 | 46.0000 | 73.4800 |
| Central region | 72.2868 | 29.4367 | 92.9300 | 47.5600 | 72.4095 |
| Western region | 71.8195 | 30.9649 | 90.1500 | 41.1900 | 72.0000 |
| E | Overall data | | 61.3713 | 60.4089 | 95.1600 | 31.0080 | 61.0600 |
| Pollution level classification | High-pollution industries | 62.3640 | 57.0888 | 91.6600 | 31.0800 | 61.9140 |
| Low-pollution industries | 61.0061 | 61.1386 | 95.1600 | 31.4500 | 60.5400 |
| S | Overall data | | 74.0309 | 98.9266 | 100.0000 | 4.8800 | 74.7600 |
| Allocation of input factors | Technology-driven | 73.6615 | 78.8193 | 100.0000 | 16.4400 | 74.3345 |
| Labor-driven | 74.5425 | 126.3453 | 100.0000 | 4.8800 | 75.3390 |
| G | Overall data | | 78.4366 | 54.3505 | 97.3300 | 17.2000 | 79.8300 |
| Property rights | State-owned | 79.3286 | 46.0138 | 97.3300 | 29.6000 | 80.4550 |
| Non-state-owned | 77.5004 | 61.3945 | 97.3300 | 17.2000 | 79.2020 |
